# Supplementary material for: Base-stabilized silaimine and its donor-free dimer derived from the reaction of NHC-supported silylene with SiCl4
Source: Royal Society of Chemistry journal article supplement (doi:10.1039/c5dt03917g), 2015-01-01
Supplement: c5dt03917g1.pdf [file c5dt03917g1.pdf]

Supporting Information for

Base-Stabilized Silaimine and its Donor-Free Dimer Derived from the Reaction  
of NHC-Supported Silylene with SiCl<sub>4</sub>

Haiyan Cui<sup>\*a</sup> and Chunming Cui<sup>\*b</sup>

<sup>a</sup>Department of Chemistry, College of Sciences, Nanjing Agricultural University, Nanjing 210095, People's  
Republic of China

E-mail: haiyancui555@163.com

<sup>b</sup>State Key Laboratory and Institute of Elemento-organic Chemistry, Nankai University, Tianjin 300071, People's  
Republic of China

E-mail: cmcui@nankai.edu.cn

Contents

|                                      |    |
|--------------------------------------|----|
| Experimental Section.....            | S2 |
| X-ray Structural Determinations..... | S3 |
| References.....                      | S4 |

## Experimental Section

**General considerations:** All operations were carried out under an atmosphere of dry argon or nitrogen by using modified Schlenck line and glovebox techniques. All solvents were freshly distilled from Na and degassed immediately prior to use. Elemental analyses were carried out on an Elemental Vario EL analyzer. The  $^1\text{H}$ ,  $^{13}\text{C}$  and  $^{29}\text{Si}$  NMR spectroscopic data were recorded on Bruker Mercury Plus 300, 400 and 600 MHz NMR spectrometers. Infrared spectra were recorded on a Bio-Rad FTS 6000 spectrometer. The UV-vis spectra were recorded on a Shimadzu UV-2450 spectrometer and Emission spectra on an Edinburgh Analytical Instruments FL900CD spectrometer.  $\text{ArN}(\text{SiMe}_3)\text{Si}(\text{iPr})\text{Cl}$  (**1**)<sup>1</sup> (Ar = 2,6-*i*Pr<sub>2</sub>C<sub>6</sub>H<sub>3</sub>, iPr = 1,3-diisopropyl-4,5-dimethylimidazol-2-ylidene) was synthesized according to published procedure.

**Synthesis of  $\text{ArN}=\text{SiCl}_2(\text{iPr})$  (**2**):** A solution of  $\text{SiCl}_4$  (1.5 ml, 0.53 mmol, 0.35 M solution in  $\text{Et}_2\text{O}$ ) was added to a stirred solution of **1** (0.26g, 0.5 mmol) in  $\text{Et}_2\text{O}$  (5mL) at room temperature. Soon white suspension formed. The mixture was allowed to stir for 2h. After filtration, the residue white power is neat **2** (0.05g, 21.2%). M.p. 198-200 °C;  $^1\text{H}$  NMR (400 MHz,  $\text{C}_6\text{D}_6$ ):  $\delta$  0.95 (d,  $J = 7.0$  Hz, 12H,  $\text{CH}(\text{CH}_3)_2$ ), 1.34 (s, 6H,  $=\text{CCH}_3$ ), 1.56 (d,  $J = 6.8$  Hz, 12H,  $\text{CH}(\text{CH}_3)_2$ ), 4.13 (m, 2H, Ar- $\text{CH}(\text{CH}_3)_2$ ), 6.62 (m, 2H, N- $\text{CH}(\text{CH}_3)_2$ ), 7.09 (m, 1H, Ar- $H$ ), 7.39 (d, 2H, Ar- $H$ ) ppm;  $^{13}\text{C}$  NMR (100.61 MHz,  $d^8$ -THF):  $\delta$  10.69 ( $=\text{CCH}_3$ ), 21.08 ( $\text{CH}(\text{CH}_3)_2$ ), 24.16 ( $\text{CH}(\text{CH}_3)_2$ ), 28.47 (Ar- $\text{CH}(\text{CH}_3)_2$ ), 51.73 (N- $\text{CH}(\text{CH}_3)_2$ ), 116.06, 122.01, 129.73, 139.90, 145.78 (Ar-C), 145.99 (NCN) ppm;  $^{29}\text{Si}$  NMR (79.49 MHz,  $d^8$ -THF):  $\delta$  -107.03 ppm; Elemental analysis (%) calcd for  $\text{C}_{23}\text{H}_{37}\text{Cl}_2\text{N}_3\text{Si}$ : C, 60.77; H, 8.20; N, 9.24; Found: C, 60.26; H, 8.53; N, 8.93; IR ( $\text{cm}^{-1}$ ):  $\nu$  469.71, 541.48, 638.24, 757.49, 809.22, 915.63, 1038.81, 1104.74, 1171.35, 1209.04, 1244, 1312.82, 1373.38, 1622.99, 1963.51, 2274.55, 2324.13, 2976.06.

**Synthesis of  $\text{ArN}(\text{SiMe}_3)\text{SiCl}_3$  (**3**):** A solution of  $\text{SiCl}_4$  (1.5 ml, 1.36 mmol) in hexane (15 mL) was added to a stirred suspension of **1** (0.49 g, 1 mmol) in hexane (70 mL) at room temperature. Soon the suspension became clarified. The mixture was allowed to stir for overnight whereupon a white precipitate formed. After filtration (the residual solid was  $\text{iPr}\cdot\text{SiCl}_4$ ) and removal of solvents under vacuum afforded colorless solid **3** (0.35 g, 91.4%). M.p. 127°C-130°C;  $^1\text{H}$  NMR (400 MHz,  $\text{C}_6\text{D}_6$ ):  $\delta$  7.07 – 6.94 (m, 3H, Ar- $H$ ), 3.45 (m, 2H,  $\text{CH}(\text{CH}_3)_2$ ), 1.25 (d,  $J = 6.8$  Hz, 6H,  $\text{CH}(\text{CH}_3)_2$ ), 1.16 (d,  $J = 6.8$  Hz, 6H,  $\text{CH}(\text{CH}_3)_2$ ), 0.19 (s, 9H,  $\text{Si}(\text{CH}_3)_3$ ).  $^{13}\text{C}$  NMR (100.61 MHz,  $\text{C}_6\text{D}_6$ ):  $\delta$  147.3, 138.5, 127.2, 124.8 (Ar-C), 28.5 ( $\text{CH}(\text{CH}_3)_2$ ), 25.4 and 24.7

(CH(CH<sub>3</sub>)<sub>2</sub>), 1.7 (Si(CH<sub>3</sub>)<sub>3</sub>). <sup>29</sup>Si NMR (79.49 MHz, C<sub>6</sub>D<sub>6</sub>): δ -27.3 (SiCl<sub>3</sub>) ppm. Elemental analysis (%) calcd for C<sub>15</sub>H<sub>26</sub>Cl<sub>3</sub>NSi<sub>2</sub>: C, 47.05; H, 6.84; N, 3.66; Found: C, 47.01; H, 6.86; N, 3.61.

**Path b for IPr·SiCl<sub>4</sub>:** Neat SiCl<sub>4</sub> (0.2 ml, 1.8 mmol) was added to a stirred solution of IPr (0.09g, 0.5 mmol) in toluene (10 mL) at ambient temperature. The mixture was allowed to stir for 1h, and then the volatiles were removed under vacuum. The residue was washed with n-hexane (5 ml) to afford white powder IPr·SiCl<sub>4</sub> (0.14g, 80.0%). : <sup>1</sup>H NMR (400 MHz, C<sub>6</sub>D<sub>6</sub>): δ 6.00 (s, 2H, CH(CH<sub>3</sub>)<sub>2</sub>), 1.33 (s, 6H, =CCH<sub>3</sub>), 1.13 (d, *J* = 7.0 Hz, 12H, CH(CH<sub>3</sub>)<sub>2</sub>). <sup>13</sup>C NMR (100.61 MHz, C<sub>6</sub>D<sub>6</sub>): δ 154.59 (NCN), 125.64 (CH<sub>3</sub>C=), 52.19 (CH(CH<sub>3</sub>)<sub>2</sub>), 20.76 (CH(CH<sub>3</sub>)<sub>2</sub>), 10.19 (=CCH<sub>3</sub>). <sup>29</sup>Si NMR (79.49 MHz, C<sub>6</sub>D<sub>6</sub>): δ -104.95 (SiCl<sub>4</sub>) ppm.

**Synthesis of ArN(SiMe<sub>3</sub>)SiCl<sub>2</sub>SiCl<sub>3</sub> (4') and (ArNSiCl<sub>2</sub>)<sub>2</sub> (4):** A suspension of **1** (0.25g, 0.5 mmol) in hexane (15mL) was added to a stirred solution of SiCl<sub>4</sub> (1.5 ml, 0.53 mmol, 0.35 M solution in Et<sub>2</sub>O) in hexane (15 mL) at room temperature. The mixture was stirred overnight. After filtration (the residue white powder was IPr·SiCl<sub>4</sub>) and removal solvents, the remaining residue (a mixture of **4'** (about 70%), **3**, and undefined coproducts) was dissolved in toluene (15 ml) and heated at 80 °C for 16 h. Concentration to ca. 1~2 mL and storage at -10 °C afforded colorless crystals of **4** (0.09 g, 64.3%). **4'**: <sup>1</sup>H NMR (400 MHz, C<sub>6</sub>D<sub>6</sub>): δ 7.05 – 6.93 (m, 3H, Ar-*H*), 3.46 (m, 2H, CH(CH<sub>3</sub>)<sub>2</sub>), 1.25 (d, 6H, CH(CH<sub>3</sub>)<sub>2</sub>), 1.16 (d, 6H, CH(CH<sub>3</sub>)<sub>2</sub>), 0.18 (s, 9H, Si(CH<sub>3</sub>)<sub>3</sub>) ppm. <sup>13</sup>C NMR (100.61 MHz, C<sub>6</sub>D<sub>6</sub>): δ 147.28, 138.54, 124.77, 28.49, 25.46, 24.63, 1.74 ppm. **4**: Sublimation at 260 °C; <sup>1</sup>H NMR (400 MHz, C<sub>6</sub>D<sub>6</sub>): δ 7.06-7.12 (m, 6H, Ar-*H*), 3.86 (m, 4H, CH(CH<sub>3</sub>)<sub>2</sub>), 1.29 (d, *J* = 6.8 Hz, 24H, CH(CH<sub>3</sub>)<sub>2</sub>) ppm; <sup>13</sup>C NMR (100.61 MHz, C<sub>6</sub>D<sub>6</sub>): δ 147.44, 129.43, 127.50 and 125.09 (Ar-C), 28.64 (CH(CH<sub>3</sub>)<sub>2</sub>), 25.66 (CH(CH<sub>3</sub>)<sub>2</sub>) ppm; <sup>29</sup>Si NMR (79.49 MHz, d<sup>8</sup>-THF): δ -43.15 (SiCl<sub>2</sub>) ppm; Elemental analysis (%) calcd for C<sub>24</sub>H<sub>34</sub>Cl<sub>4</sub>N<sub>2</sub>Si<sub>2</sub>: C, 52.55; H, 6.25; N, 5.11; Found: C, 52.37; H, 6.03; N, 5.56;

**X-ray Structural Determinations.** All intensities for compounds **2** and **4** were collected with a Rigaku Saturn 724 CCD diffractometer using graphite-monochromated Mo K<sub>α</sub> radiation (λ = 0.71073 Å) at 113(2) K. The structure was solved by direct methods (*SHELXS-97*)<sup>2</sup> and refined by full-matrix least squares on *F*<sup>2</sup>. All non-hydrogen atoms were refined anisotropically and hydrogen atoms by a riding model (*SHELXL-97*).<sup>3</sup> Crystals of **2** suitable for X-ray analysis were grown from mixture of THF and toluene. And crystals of **4** suitable for X-ray analysis were grown from toluene. Crystallographic data for **2** and **4** are given in Table S1.

Table S1: Crystallographic data for **2** and **4**.

| Compound                                                         | <b>2</b>                                                                                        | <b>4</b>                                                                       |
|------------------------------------------------------------------|-------------------------------------------------------------------------------------------------|--------------------------------------------------------------------------------|
| CCDC No.                                                         | 1418863                                                                                         | 1418862                                                                        |
| Empirical formula                                                | C <sub>23</sub> H <sub>37</sub> Cl <sub>2</sub> N <sub>3</sub> Si•C <sub>7</sub> H <sub>8</sub> | C <sub>24</sub> H <sub>34</sub> Cl <sub>4</sub> N <sub>2</sub> Si <sub>2</sub> |
| Formula weight                                                   | 546.68                                                                                          | 548.51                                                                         |
| Temperature/K                                                    | 113(2)                                                                                          | 113(2)                                                                         |
| Wavelength /Å                                                    | 0.71073                                                                                         | 0.71073                                                                        |
| Crystal system                                                   | Monoclinic                                                                                      | Monoclinic                                                                     |
| space group                                                      | P2(1)/n                                                                                         | P2(1)/n                                                                        |
| <i>a</i> /Å                                                      | 9.490(4)                                                                                        | 9.730(6)                                                                       |
| <i>b</i> /Å                                                      | 14.842(6)                                                                                       | 11.344(7)                                                                      |
| <i>c</i> /Å                                                      | 21.882(9)                                                                                       | 13.051(8)                                                                      |
| $\alpha$ (°)                                                     | 90                                                                                              | 90                                                                             |
| $\beta$ (°)                                                      | 91.321(7)                                                                                       | 96.115(9)                                                                      |
| $\gamma$ (°)                                                     | 90                                                                                              | 90                                                                             |
| <i>V</i> / Å <sup>3</sup>                                        | 3081(2)                                                                                         | 1432.3(15)                                                                     |
| <i>Z</i>                                                         | 4                                                                                               | 2                                                                              |
| <i>d</i> <sub>calcd.</sub> (g/cm <sup>3</sup> )                  | 1.179                                                                                           | 1.272                                                                          |
| F(000)                                                           | 1176.0                                                                                          | 576                                                                            |
| Limiting indices                                                 | -11 ≤ <i>h</i> ≤ 10<br>-17 ≤ <i>k</i> ≤ 17<br>-26 ≤ <i>l</i> ≤ 26                               | -8 ≤ <i>h</i> ≤ 12,<br>-14 ≤ <i>k</i> ≤ 14<br>-17 ≤ <i>l</i> ≤ 16              |
| Reflections collected / unique                                   | 23056 / 5427                                                                                    | 12871 / 3411                                                                   |
| GOF                                                              | 1.073                                                                                           | 0.923                                                                          |
| <i>R</i> <sub><i>I</i></sub> ( <i>I</i> > 2σ( <i>I</i> ))        | 0.0656                                                                                          | 0.0343                                                                         |
| <i>wR</i> ( <i>F</i> <sup>2</sup> ) ( <i>I</i> > 2σ( <i>I</i> )) | 0.1669                                                                                          | 0.0791                                                                         |
| <i>R</i> <sub><i>I</i></sub> (all data)                          | 0.0825                                                                                          | 0.0476                                                                         |
| <i>wR</i> ( <i>F</i> <sup>2</sup> ) (all data)                   | 0.1781                                                                                          | 0.0818                                                                         |

## References

1. Cui, H.; Cui, C. *Dalton Trans.* **2011**, *40*, 11937.
2. Sheldrick, G. M. SHELXS-90/96, *Program for Structure Solution, Acta Crystallogr. Sect. A* **1990**, *46*, 467.

3. Sheldrick, G. M. *SHELXL 97, Program for Crystal Structure Refinement*, University of Goettingen, Goettingen, Germany, **1997**.
